# Supplementary material for: Genome-Wide DNA Methylation Analysis of Human Pancreatic Islets from Type 2 Diabetic and Non-Diabetic Donors Identifies Candidate Genes That Influence Insulin Secretion
Source: PLoS Genet. 2014 Mar 6;10(3):e1004160. doi: 10.1371/journal.pgen.1004160 (PMC3945174; doi:10.1371/journal.pgen.1004160)
Supplement: Table S4 — CpG sites with differential DNA methylation (q<0.05 and difference in methylation ≥5%) concurrent with a difference in mRNA expression (P≤0.05) of the nearest gene in pancreatic islets from 34 non-diabetic versus 15 T2D human donors. (XLSX) [file pgen.1004160.s009.xlsx]

## Sheet: Sheet1
Table S4. CpG sites with differential DNA methylation (q < 0.05 and difference in methylation ≥ 5%) concurrent with a difference in mRNA expression (P ≤ 0.05) of the nearest gene in pancreatic islets from 34 non-diabetic versus 15 T2D human donors.
Gene symbol	probe ID	Non-diabetic mRNA expr	T2D mRNA expr	Delta	P-value	probe ID	Non-diabetic DNA meth (%)	T2D DNA meth (%)	Delta (%)	P-value	q-value	Chr.	Coordinate 36	Gene symbol	Gene region	Relation to CpG island	Exp vs. Meth
	mRNA expr	(mean ± Sd)	(mean ± Sd)	mRNA expr	mRNA expr	DNA meth	(mean ± Sd)	(mean ± Sd)	DNA meth	DNA meth	DNA meth
ACSL5	7930498	207.6 ± 11.6	411.77 ± 71.61	204.17	0.0019	cg02273922	41.83 ± 4.91	36.34 ± 5.14	-5.49	2.8 x 10-6	0.008	10	114125968	ACSL5;ACSL5;ACSL5;ACSL5	5'UTR;5'UTR;1stExon;5'UTR		Negative
ALDH3B1	7941961	261.2 ± 6.9	291.70 ± 12.81	30.46	0.030	cg21667069	73.88 ± 5.53	68.20 ± 6.22	-5.68	2.8 x 10-4	0.047	11	67535217	ALDH3B1;ALDH3B1;ALDH3B1	5'UTR;5'UTR;5'UTR		Negative
AP3S1	8107421	335.4 ± 8.6	348.44 ± 11.99	13.08	0.025	cg09523691	32.73 ± 6.43	25.14 ± 3.55	-7.58	3.0 x 10-4	0.049	5	115206709	ATG12;AP3S1	TSS1500;Body	S_Shore	Negative
ARHGAP26	8108873	247.5 ± 11.3	311.98 ± 17.46	64.45	0.0028	cg18254586	75.41 ± 6.15	69.87 ± 6.32	-5.54	1.6 x 10-4	0.037	5	142188596	ARHGAP26;ARHGAP26	Body;Body		Negative
ARSJ	8102440	94.6 ± 3.5	127.73 ± 8.61	33.12	0.0092	cg01351300	68.98 ± 5.17	62.54 ± 5.53	-6.44	2.8 x 10-4	0.048	4	115092528	ARSJ	Body		Negative
ATP13A4	8092800	96.7 ± 6.2	108.50 ± 9.99	11.78	0.019	cg19795338	71.21 ± 6.23	63.89 ± 7.67	-7.32	8.0 x 10-5	0.029	3	194756169	ATP13A4	TSS1500		Negative
ATP8A1	8100026	506.4 ± 32.8	362.02 ± 40.29	-144.4	0.043	cg03640051	48.70 ± 4.63	56.48 ± 5.50	7.79	6.5 x 10-5	0.027	4	42352446	ATP8A1;ATP8A1	Body;Body	N_Shore	Negative
BAMBI	7926875	577.4 ± 18.9	670.45 ± 38.26	93.08	0.026	cg05046589	56.96 ± 4.67	50.36 ± 3.03	-6.6	3.2 x 10-4	0.050	10	29010540	BAMBI	Body	S_Shelf	Negative
C1orf106	7908639	210.4 ± 9.2	268.60 ± 17.89	58.16	0.019	cg06854264	62.11 ± 6.21	56.26 ± 6.12	-5.84	2.4 x 10-5	0.018	1	199127877	C1orf106	Body	S_Shore	Negative
C1orf106	7908639	210.4 ± 9.3	268.60 ± 17.90	58.16	0.019	cg13419869	66.98 ± 4.44	61.74 ± 5.31	-5.25	6.6 x 10-5	0.027	1	199130309	C1orf106;C1orf106	TSS1500;Body	S_Shelf	Negative
C1orf106	7908639	210.4 ± 9.2	268.60 ± 17.91	58.16	0.019	cg11150074	73.92 ± 4.27	68.68 ± 6.15	-5.24	2.3 x 10-4	0.044	1	199130182	C1orf106;C1orf106	TSS1500;Body	S_Shelf	Negative
C21orf63	8068202	353.6 ± 8.8	417.98 ± 20.50	64.36	0.029	cg10095801	76.04 ± 4.14	70.92 ± 5.89	-5.12	3.1 x 10-4	0.050	21	32707859	C21orf63	Body	S_Shore	Negative
C6orf145	8123678	345.7 ± 11.9	429.89 ± 22.63	84.19	0.033	cg23169762	56.16 ± 8.22	46.29 ± 10.12	-9.87	1.9 x 10-4	0.040	6	3694853	C6orf145	Body	N_Shore	Negative
C6orf145	8123678	345.7 ± 11.9	429.89 ± 22.64	84.19	0.033	cg05411199	66.30 ± 6.40	58.03 ± 7.64	-8.27	1.1 x 10-5	0.014	6	3694714	C6orf145	Body	N_Shore	Negative
C6orf145	8123678	345.7 ± 11.9	429.89 ± 22.65	84.19	0.033	cg25609749	67.79 ± 5.50	61.35 ± 7.26	-6.43	5.7 x 10-5	0.025	6	3688351	C6orf145	Body		Negative
CCDC85C	7981273	178.72 ± 4.69	191.21 ± 6.39	12.49	0.038	cg04339462	61.55 ± 5.68	56.36 ± 3.96	-5.19	1.2 x 10-4	0.034	14	99097949	CCDC85C	Body		Negative
CD9	7953291	1705.95 ± 44.79	2007.32 ± 86.10	301.37	0.041	cg02586910	30.02 ± 4.23	24.17 ± 3.68	-5.84	1.2 x 10-4	0.033	12	6184864	CD9	Body		Negative
CDKN1A	8119088	622.56 ± 16.90	770.76 ± 29.54	148.2	0.0053	cg24425727	56.19 ± 8.03	44.47 ± 6.79	-11.72	1.2 x 10-4	0.033	6	36753626	CDKN1A;CDKN1A	TSS1500;TSS1500	N_Shore	Negative
CDKN1A	8119088	622.56 ± 16.91	770.76 ± 29.55	148.2	0.0053	cg15474579	49.95 ± 7.01	39.09 ± 6.53	-10.86	1.5 x 10-4	0.037	6	36753790	CDKN1A;CDKN1A	TSS1500;TSS1500	N_Shore	Negative
CDKN1A	8119088	622.56 ± 16.92	770.76 ± 29.56	148.2	0.0053	cg03714916	34.08 ± 5.28	24.84 ± 4.76	-9.24	1.9 x 10-6	0.008	6	36753864	CDKN1A;CDKN1A	TSS1500;TSS1500	N_Shore	Negative
CDKN1A	8119088	622.56 ± 16.93	770.76 ± 29.57	148.2	0.0053	cg05460965	55.69 ± 3.82	46.79 ± 3.71	-8.9	3.2 x 10-7	0.004	6	36753078	CDKN1A;CDKN1A	TSS1500;TSS1500	N_Shore	Negative
CDKN1A	8119088	622.56 ± 16.94	770.76 ± 29.58	148.2	0.0053	cg21091547	69.21 ± 5.10	60.97 ± 5.70	-8.25	3.7 x 10-6	0.009	6	36753478	CDKN1A;CDKN1A	TSS1500;TSS1500	N_Shore	Negative
DEPDC1B	8112260	31.06 ± 0.94	35.82 ± 2.16	4.76	0.024	cg08795084	67.19 ± 5.19	61.23 ± 5.40	-5.96	1.8 x 10-5	0.016	5	60007313	DEPDC1B;DEPDC1B	Body;Body		Negative
EDN1	8116921	458.93 ± 30.43	607.14 ± 43.50	148.21	0.026	cg11215644	50.89 ± 5.71	45.57 ± 6.48	-5.32	1.3 x 10-5	0.014	6	12404421	EDN1;EDN1	3'UTR;3'UTR		Negative
EHF	7939314	752.99 ± 29.07	880.18 ± 42.65	127.19	0.018	cg15994604	53.95 ± 4.42	47.73 ± 5.14	-6.23	2.3 x 10-4	0.044	11	34633259	EHF	Body		Negative
EPS8	7961546	947.31 ± 44.48	1176.63 ± 78.02	229.32	0.0003	cg08739221	43.02 ± 6.78	35.77 ± 5.28	-7.25	2.9 x 10-4	0.048	12	15825009	EPS8	5'UTR		Negative
EXOC3L2	8037513	211.76 ± 3.82	191.04 ± 3.90	-20.72	0.0029	cg25293896	27.48 ± 4.71	33.01 ± 6.77	5.53	1.8 x 10-4	0.039	19	50412789	EXOC3L2	Body	Island	Negative
EXOC3L2	8037513	211.76 ± 3.82	191.04 ± 3.90	-20.72	0.0029	cg26787220	34.75 ± 5.86	40.20 ± 6.81	5.44	3.1 x 10-4	0.049	19	50412611	EXOC3L2	Body	Island	Negative
FERMT1	8064904	95.15 ± 7.38	178.40 ± 27.90	83.25	0.0058	cg15692360	73.94 ± 5.23	67.68 ± 5.84	-6.26	1.0 x 10-4	0.031	20	6052267	FERMT1	TSS200	S_Shore	Negative
FUT6	8033043	90.88 ± 2.53	98.64 ± 3.39	7.76	0.024	cg05374956	72.61 ± 6.03	65.72 ± 7.57	-6.89	7.3 x 10-5	0.028	19	5789735	FUT6;FUT6;FUT6;FUT6	1stExon;5'UTR;1stExon;5'UTR		Negative
FUT6	8033043	90.88 ± 2.53	98.64 ± 3.39	7.76	0.024	cg00579402	71.53 ± 5.00	66.06 ± 5.26	-5.47	2.0 x 10-4	0.041	19	5789999	FUT6;FUT6;FUT6;FUT6	1stExon;5'UTR;1stExon;5'UTR		Negative
GALNT5	8045835	80.10 ± 7.59	131.71 ± 21.23	51.61	0.0045	cg24576425	25.51 ± 4.66	19.85 ± 3.21	-5.66	2.4 x 10-5	0.018	2	157822650	GALNT5;GALNT5	1stExon;5'UTR		Negative
GCNT2	8116835	85.37 ± 2.58	92.52 ± 4.29	7.15	0.013	cg22378252	51.08 ± 4.49	44.70 ± 4.84	-6.38	6.2 x 10-8	0.003	6	10629438	GCNT2	TSS200		Negative
GMDS	8123562	511.56 ± 17.57	595.38 ± 23.09	83.82	0.0089	cg26807095	65.28 ± 7.72	57.07 ± 7.68	-8.21	1.8 x 10-4	0.039	6	1778915	GMDS	Body		Negative
GMDS	8123562	511.56 ± 17.57	595.38 ± 23.09	83.82	0.0089	cg25049733	27.40 ± 4.86	20.21 ± 2.94	-7.19	3.1 x 10-6	0.009	6	1932268	GMDS	Body		Negative
HDAC7	7962659	227.70 ± 5.31	260.80 ± 10.47	33.1	0.018	cg20995304	77.52 ± 5.53	71.14 ± 7.02	-6.38	2.8 x 10-4	0.048	12	46482434	HDAC7;HDAC7	Body;Body		Negative
HDAC7	7962659	227.70 ± 5.31	260.80 ± 10.47	33.1	0.018	cg04381888	46.06 ± 5.31	40.61 ± 5.55	-5.45	8.8 x 10-5	0.029	12	46481816	HDAC7;HDAC7	Body;Body		Negative
HDAC7	7962659	227.70 ± 5.31	260.80 ± 10.47	33.1	0.018	cg10583414	50.14 ± 4.31	44.69 ± 4.43	-5.44	5.4 x 10-5	0.025	12	46493330	HDAC7;HDAC7	Body;Body	Island	Negative
HHLA2	8081488	180.82 ± 15.94	218.34 ± 29.89	37.52	0.0056	cg08817540	77.84 ± 5.84	72.88 ± 7.19	-4.96	6.0 x 10-5	0.026	3	109503417	HHLA2	TSS1500		Negative
HNMT	8045499	102.44 ± 6.08	121.67 ± 10.04	19.23	0.020	cg06162038	38.49 ± 8.75	28.28 ± 7.56	-10.2	1.4 x 10-4	0.035	2	138443687	HNMT;HNMT	Body;Body		Negative
IL1R2	8043981	125.64 ± 7.71	183.25 ± 14.50	57.61	0.016	cg21674927	51.33 ± 4.01	45.76 ± 4.60	-5.57	2.2 x 10-5	0.017	2	102010679	IL1R2;IL1R2	Body;Body		Negative
IL1RL2	8044008	51.90 ± 1.76	63.40 ± 3.54	11.5	0.041	cg22797169	77.00 ± 4.56	71.96 ± 7.13	-5.04	2.0 x 10-4	0.041	2	102169839	IL1RL2	TSS200	N_Shore	Negative
IRS1	8059470	128.74 ± 3.71	155.24 ± 10.56	26.5	0.030	cg04751089	40.02 ± 6.28	33.09 ± 4.40	-6.93	5.5 x 10-5	0.025	2	227367880	IRS1	3'UTR	N_Shelf	Negative
ITGA3	8008237	1014.03 ± 41.88	1316.23 ± 90.45	302.2	0.021	cg13213536	58.55 ± 7.65	50.58 ± 7.65	-7.97	2.0 x 10-4	0.041	17	45491823	ITGA3;ITGA3	Body;Body	S_Shelf	Negative
ITGB5	8090162	855.02 ± 21.48	1045.91 ± 44.69	190.89	0.0024	cg11383291	57.63 ± 5.89	49.32 ± 6.50	-8.31	8.7 x 10-5	0.029	3	126080628	ITGB5	Body		Negative
IYD	8122744	44.16 ± 1.66	49.93 ± 3.26	5.77	0.039	cg02872263	54.77 ± 5.15	49.24 ± 6.07	-5.54	2.8 x 10-4	0.047	6	150766371	IYD;IYD;IYD	3'UTR;3'UTR;3'UTR		Negative
KCNIP3	8043552	75.43 ± 1.74	84.68 ± 3.10	9.25	0.013	cg17412560	53.38 ± 4.73	47.85 ± 4.99	-5.53	4.8 x 10-5	0.023	2	95327130	KCNIP3	Body		Negative
KCNK5	8126153	297.80 ± 19.95	356.86 ± 36.00	59.06	0.040	cg18705155	67.85 ± 5.34	62.03 ± 5.52	-5.82	1.0 x 10-4	0.031	6	39302055	KCNK5	Body	N_Shelf	Negative
KRT7	7955613	2147.10 ± 112.53	2787.37 ± 189.63	640.27	0.026	cg10369242	53.43 ± 6.53	47.42 ± 5.58	-6.01	9.8 x 10-5	0.031	12	50911753	KRT7	TSS1500	N_Shore	Negative
KRT80	7963333	264.14 ± 15.31	361.16 ± 23.63	97.02	0.027	cg07925587	67.83 ± 6.59	61.52 ± 7.94	-6.31	1.6 x 10-4	0.037	12	50869591	KRT80;KRT80	Body;Body		Negative
LAD1	7923347	644.34 ± 32.60	869.05 ± 59.73	224.71	0.025	cg11418783	65.14 ± 8.04	56.40 ± 7.39	-8.74	3.8 x 10-5	0.021	1	199636273	LAD1	TSS1500	S_Shore	Negative
LAMC2	7908072	1834.85 ± 128.67	3033.76 ± 323.94	1198.91	0.025	cg00208830	70.85 ± 5.50	65.59 ± 5.98	-5.26	3.0 x 10-4	0.049	1	181421401	LAMC2;LAMC2	TSS1500;TSS1500		Negative
LBH	8041206	536.67 ± 17.44	620.72 ± 34.28	84.05	0.031	cg17250262	57.52 ± 6.13	51.79 ± 6.68	-5.73	1.3 x 10-4	0.034	2	30310614	LBH	Body	S_Shore	Negative
LCN2	8158167	1653.19 ± 147.91	2179.01 ± 216.30	525.82	0.0050	cg21157065	77.09 ± 4.15	72.05 ± 5.61	-5.04	3.0 x 10-4	0.048	9	129952969	LCN2	Body		Negative
LITAF	7999468	1429.15 ± 47.25	1672.72 ± 78.49	243.57	0.026	cg04359558	56.61 ± 8.72	46.81 ± 7.59	-9.8	2.9 x 10-5	0.019	16	11555725	LITAF;LITAF;LITAF;LITAF	Body;Body;Body;Body		Negative
MARCH3	8113790	556.79 ± 20.49	687.28 ± 53.55	130.49	0.017	cg24718756	68.79 ± 3.95	63.54 ± 5.07	-5.24	1.3 x 10-4	0.034	5	126335994	2013-03-03	5'UTR		Negative
MGLL	8090433	169.56 ± 7.27	241.89 ± 19.00	72.33	0.0001	cg04155862	47.70 ± 5.7	40.90 ± 5.23	-6.8	2.7 x 10-4	0.047	3	129023862	MGLL;MGLL;MGLL	5'UTR;5'UTR;1stExon	N_Shore	Negative
MST1R	8087547	121.36 ± 4.59	173.20 ± 14.29	51.84	0.0023	cg11839681	79.46 ± 4.78	73.94 ± 6.18	-5.52	2.0 x 10-4	0.041	3	49915923	MST1R	1stExon	Island	Negative
MUC5B	7937612	155.31 ± 6.60	208.29 ± 19.46	52.98	0.018	cg20340346	88.22 ± 5.59	81.27 ± 8.26	-6.94	1.5 x 10-4	0.036	11	1207468	MUC5B	Body	N_Shore	Negative
MUC5B	7937612	155.31 ± 6.60	208.29 ± 19.46	52.98	0.018	cg27482328	68.05 ± 5.54	62.51 ± 5.96	-5.54	4.0 x 10-5	0.022	11	1202852	MUC5B	Body	N_Shore	Negative
MYOF	7935058	688.97 ± 33.63	875.68 ± 55.15	186.71	0.017	cg14060519	71.23 ± 4.69	63.22 ± 5.02	-8.01	5.1 x 10-7	0.005	10	95212857	MYOF;MYOF	Body;Body		Negative
NOSTRIN	8046099	99.63 ± 7.04	139.03 ± 12.25	39.4	0.0015	cg18556822	70.05 ± 5.15	64.52 ± 7.59	-5.54	2.6 x 10-4	0.046	2	169367127	NOSTRIN;NOSTRIN;NOSTRIN;NOSTRIN	5'UTR;TSS1500;TSS1500;TSS1500		Negative
NR2F2	7986329	381.57 ± 6.34	410.64 ± 12.75	29.07	0.034	cg13772742	64.85 ± 6.62	57.54 ± 7.68	-7.31	3.8 x 10-5	0.021	15	94679389	NR2F2;NR2F2;NR2F2;NR2F2	Body;Body;Body;Body	S_Shore	Negative
NR2F2	7986329	381.57 ± 6.34	410.64 ± 12.75	29.07	0.034	cg23734137	66.19 ± 4.20	59.77 ± 4.10	-6.42	1.1 x 10-6	0.006	15	94669118	NR2F2	TSS1500	S_Shore	Negative
NR2F2	7986329	381.57 ± 6.34	410.64 ± 12.75	29.07	0.034	cg01213447	64.57 ± 4.95	58.26 ± 5.86	-6.3	9.9 x 10-5	0.031	15	94672580	NR2F2	Body	N_Shore	Negative
PDE7B	8122222	93.71 ± 2.55	120.32 ± 7.36	26.61	0.0007	cg23090824	41.55 ± 8.60	31.94 ± 6.04	-9.61	8.1 x 10-6	0.012	6	136214778	PDE7B;PDE7B	1stExon;5'UTR		Negative
PDE7B	8122222	93.71 ± 2.55	120.32 ± 7.36	26.61	0.0007	cg24283684	25.04 ± 6.03	17.51 ± 4.55	-7.53	4.6 x 10-5	0.023	6	136214640	PDE7B;PDE7B	1stExon;5'UTR		Negative
PDE7B	8122222	93.71 ± 2.55	120.32 ± 7.36	26.61	0.0007	cg03984009	55.30 ± 5.93	47.98 ± 4.89	-7.32	1.8 x 10-5	0.016	6	136214246	PDE7B	TSS1500		Negative
PDE7B	8122222	93.71 ± 2.55	120.32 ± 7.36	26.61	0.0007	cg27306443	23.33 ± 5.99	16.54 ± 3.80	-6.79	2.1 x 10-6	0.008	6	136214511	PDE7B	TSS200		Negative
PDLIM4	8107897	270.05 ± 7.60	335.25 ± 16.26	65.2	0.010	cg06947286	65.15 ± 7.30	57.04 ± 6.89	-8.11	4.0 x 10-6	0.010	5	131624501	PDLIM4;PDLIM4	Body;Body	S_Shelf	Negative
PPAPDC1A	7930980	132.55 ± 4.40	148.08 ± 9.07	15.53	0.013	cg12011977	33.04 ± 5.42	26.93 ± 4.00	-6.11	2.6 x 10-5	0.018	10	122205725	PPAPDC1A	TSS1500	N_Shore	Negative
PTK2B	8145490	215.89 ± 3.83	238.70 ± 8.95	22.81	0.020	cg15681255	59.16 ± 6.31	53.03 ± 6.68	-6.14	2.3 x 10-4	0.043	8	27248058	PTK2B;PTK2B;PTK2B;PTK2B	5'UTR;5'UTR;5'UTR;5'UTR		Negative
PTTG1IP	8070819	2433.76 ± 43.49	2680.30 ± 38.91	246.54	0.018	cg22434923	53.34 ± 8.02	47.19 ± 5.09	-6.15	1.0 x 10-4	0.031	21	45114349	PTTG1IP	Body	N_Shelf	Negative
PYGB	8061447	539.32 ± 12.35	611.83 ± 22.90	72.51	0.035	cg24626310	60.00 ± 6.88	53.01 ± 7.05	-6.99	2.2 x 10-4	0.043	20	25224739	ABHD12;PYGB	Body;Body		Negative
SEPT9	8010161	360.92 ± 9.81	447.51 ± 26.23	86.59	0.017	cg23716141	72.22 ± 5.32	64.34 ± 6.10	-7.88	4.8 x 10-5	0.023	17	72872072	SEPT9;SEPT9;SEPT9	5'UTR;Body;Body		Negative
SEPT9	8010161	360.92 ± 9.81	447.51 ± 26.23	86.59	0.017	cg19654743	65.87 ± 7.05	58.05 ± 7.10	-7.82	2.5 x 10-5	0.018	17	72958187	SEPT9;SEPT9;SEPT9;SEPT9;SEPT9;SEPT9	TSS200;Body;Body;Body;Body;Body	N_Shore	Negative
SEPT9	8010161	360.92 ± 9.81	447.51 ± 26.23	86.59	0.017	cg20772590	69.18 ± 6.64	61.88 ± 7.65	-7.31	3.1 x 10-4	0.049	17	72958026	SEPT9;SEPT9;SEPT9;SEPT9;SEPT9;SEPT9	TSS200;Body;Body;Body;Body;Body	N_Shore	Negative
SEPT9	8010161	360.92 ± 9.81	447.51 ± 26.23	86.59	0.017	cg21204860	59.34 ± 6.24	52.03 ± 6.98	-7.3	7.7 x 10-5	0.028	17	72958160	SEPT9;SEPT9;SEPT9;SEPT9;SEPT9;SEPT9	TSS200;Body;Body;Body;Body;Body	N_Shore	Negative
SEPT9	8010161	360.92 ± 9.81	447.51 ± 26.23	86.59	0.017	cg03568017	49.95 ± 4.76	44.91 ± 4.65	-5.04	3.2 x 10-4	0.050	17	72827098	SEPT9;SEPT9;SEPT9	5'UTR;TSS200;Body		Negative
SEPT9	8010161	360.92 ± 9.81	447.51 ± 26.23	86.59	0.017	cg06181064	73.27 ± 4.40	68.24 ± 6.09	-5.02	3.2 x 10-4	0.050	17	72862561	SEPT9;SEPT9;SEPT9	5'UTR;Body;Body		Negative
SH3RF1	8103630	555.21 ± 14.46	609.92 ± 22.34	54.71	0.031	cg01642901	67.88 ± 5.04	62.57 ± 6.10	-5.32	1.6 x 10-4	0.038	4	170426587	SH3RF1	Body	N_Shore	Negative
SH3RF1	8103630	555.21 ± 14.46	609.92 ± 22.34	54.71	0.031	cg16793173	84.18 ± 3.76	79.19 ± 6.16	-4.99	2.9 x 10-4	0.048	4	170409784	SH3RF1	Body		Negative
SHROOM3	8095834	247.62 ± 11.08	274.12 ± 16.40	26.5	0.034	cg09640555	53.53 ± 7.006	43.79 ± 8.12	-9.73	8.2 x 10-6	0.012	4	77625797	SHROOM3	Body		Negative
SLC12A7	8110755	366.61 ± 14.47	455.84 ± 28.16	89.23	0.049	cg02349468	76.05 ± 7.71	69.45 ± 12.05	-6.6	2.1 x 10-4	0.042	5	1146661	SLC12A7	Body	Island	Negative
SLC1A5	8037835	411.31 ± 14.10	529.50 ± 28.30	118.19	0.0082	cg25607249	64.59 ± 8.06	53.56 ± 9.32	-11.02	2.0 x 10-4	0.041	19	51979879	SLC1A5;SLC1A5;SLC1A5;SLC1A5	1stExon;5'UTR;Body;5'UTR	N_Shelf	Negative
SLC1A5	8037835	411.31 ± 14.10	529.50 ± 28.30	118.19	0.0082	cg03359362	68.47 ± 6.53	59.97 ± 8.56	-8.5	2.2 x 10-4	0.043	19	51981451	SLC1A5;SLC1A5;SLC1A5	TSS1500;Body;5'UTR	N_Shore	Negative
SLC22A4	8107909	90.30 ± 2.51	102.16 ± 5.83	11.86	0.045	cg04470557	59.86 ± 5.79	54.77 ± 4.28	-5.09	9.9 x 10-5	0.031	5	131658894	SLC22A4	Body	S_Shore	Negative
SLC29A3	7928208	158.95 ± 3.51	179.87 ± 7.24	20.92	0.044	cg11480762	72.74 ± 7.17	65.62 ± 7.11	-7.12	2.9 x 10-5	0.019	10	72773401	SLC29A3	Body		Negative
SLC43A3	7948229	529.31 ± 21.59	723.09 ± 39.29	193.78	0.012	cg23547429	21.76 ± 3.85	15.37 ± 3.38	-6.39	1.7 x 10-6	0.007	11	56951601	SLC43A3;SLC43A3;SLC43A3;SLC43A3	TSS1500;1stExon;5'UTR;TSS1500	S_Shore	Negative
SLC44A4	8125149	1117.52 ± 66.88	1353.14 ± 92.06	235.62	0.0051	cg18856043	38.16 ± 4.67	32.25 ± 2.97	-5.91	3.7 x 10-5	0.021	6	31953718	SLC44A4	Body		Negative
SLC4A4	8095585	2082.85 ± 137.57	2649.44 ± 166.77	566.59	0.023	cg06121226	70.50 ± 7.28	63.93 ± 7.53	-6.58	2.2 x 10-4	0.043	4	72352924	SLC4A4;SLC4A4	Body;Body		Negative
SLC4A4	8095585	2082.85 ± 137.57	2649.44 ± 166.77	566.59	0.023	cg08216584	76.97 ± 6.18	70.67 ± 6.51	-6.29	1.8 x 10-4	0.039	4	72275073	SLC4A4;SLC4A4	5'UTR;5'UTR	S_Shelf	Negative
SLCO4A1	8063923	155.26 ± 4.52	182.54 ± 6.64	27.28	0.046	cg05381729	60.66 ± 7.10	54.28 ± 5.86	-6.38	7.8 x 10-5	0.028	20	60748859	SLCO4A1	5'UTR	S_Shelf	Negative
SPATS2L	8047272	1613.47 ± 39.59	1842.34 ± 72.26	228.87	0.012	cg17868893	72.51 ± 8.03	64.40 ± 9.60	-8.1	1.3 x 10-4	0.034	2	200925736	SPATS2L;SPATS2L;SPATS2L;SPATS2L	5'UTR;5'UTR;5'UTR;5'UTR		Negative
SPATS2L	8047272	1613.47 ± 39.59	1842.34 ± 72.26	228.87	0.012	cg20627046	69.17 ± 4.80	61.48 ± 7.02	-7.69	5.5 x 10-5	0.025	2	200979423	SPATS2L;SPATS2L;SPATS2L;SPATS2L	Body;Body;Body;Body		Negative
SPATS2L	8047272	1613.47 ± 39.59	1842.34 ± 72.26	228.87	0.012	cg14361895	52.46 ± 5.82	44.97 ± 4.33	-7.5	1.4 x 10-4	0.035	2	200891022	SPATS2L;SPATS2L;SPATS2L;SPATS2L	5'UTR;5'UTR;5'UTR;5'UTR		Negative
SV2B	7986195	108.50 ± 5.93	136.35 ± 11.16	27.85	0.0009	cg27121538	52.72 ± 7.08	42.80 ± 6.20	-9.92	4.0 x 10-5	0.022	15	89447267	SV2B;SV2B	5'UTR;5'UTR	S_Shelf	Negative
SV2B	7986195	108.50 ± 5.93	136.35 ± 11.16	27.85	0.0009	cg18761976	66.79 ± 4.47	61.24 ± 6.29	-5.54	3.7 x 10-5	0.021	15	89608634	SV2B;SV2B	Body;Body		Negative
SYTL3	8123080	79.61 ± 2.88	85.91 ± 4.38	6.3	0.038	cg19884556	21.37 ± 4.24	13.93 ± 3.30	-7.45	3.5 x 10-6	0.009	6	159048324	SYTL3	Body		Negative
TFF1	8070579	810.68 ± 72.27	1634.19 ± 200.67	823.51	0.0010	cg27405706	65.91 ± 6.86	60.26 ± 7.51	-5.65	8.1 x 10-5	0.029	21	42659893	TFF1	TSS200		Negative
TFF1	8070579	810.68 ± 72.27	1634.19 ± 200.67	823.51	0.0010	cg19247032	70.06 ± 4.69	65.00 ± 5.75	-5.06	6.2 x 10-5	0.026	21	42659796	TFF1	TSS200		Negative
TJP2	8155707	935.11 ± 35.78	1156.90 ± 58.95	221.79	0.014	cg21167963	73.49 ± 5.04	67.19 ± 6.25	-6.3	6.5 x 10-6	0.011	9	70976820	TJP2	5'UTR	N_Shore	Negative
TM4SF1	8091411	5549.07 ± 182.01	6677.27 ± 282.09	1128.2	0.019	cg16810293	33.63 ± 7.11	24.11 ± 5.06	-9.52	2.5 x 10-5	0.018	3	150578433	TM4SF1	TSS200		Negative
TM4SF1	8091411	5549.07 ± 182.01	6677.27 ± 282.09	1128.2	0.019	cg06800962	56.20 ± 5.39	49.51 ± 6.74	-6.69	7.8 x 10-5	0.028	3	150578719	TM4SF1	TSS1500		Negative
TM4SF1	8091411	5549.07 ± 182.01	6677.27 ± 282.09	1128.2	0.019	cg23246821	23.58 ± 5.54	17.07 ± 3.75	-6.51	3.0 x 10-4	0.049	3	150578263	TM4SF1	TSS200		Negative
TMPRSS3	8070584	121.88 ± 6.94	174.24 ± 19.07	52.36	0.0035	cg01214847	79.45 ± 5.72	73.33 ± 5.63	-6.12	1.9 x 10-4	0.040	21	42689155	TMPRSS3;TMPRSS3;TMPRSS3;TMPRSS3	1stExon;5'UTR;5'UTR;1stExon		Negative
TMPRSS3	8070584	121.88 ± 6.94	174.24 ± 19.07	52.36	0.0035	cg07374224	41.38 ± 4.46	35.72 ± 4.87	-5.67	1.0 x 10-5	0.013	21	42682917	TMPRSS3;TMPRSS3;TMPRSS3	Body;TSS1500;Body		Negative
TNFAIP8	8107520	205.42 ± 8.08	266.55 ± 19.79	61.13	0.036	cg21239001	74.98 ± 5.75	67.42 ± 6.19	-7.56	1.2 x 10-5	0.014	5	118666517	TNFAIP8	Body		Negative
TNFRSF10B	8149733	507.07 ± 20.93	619.60 ± 33.45	112.53	0.025	cg13580286	59.25 ± 6.53	50.81 ± 7.50	-8.44	3.8 x 10-5	0.021	8	22981336	TNFRSF10B;TNFRSF10B;TNFRSF10B	Body;Body;Body	N_Shore	Negative
TRIM47	8018494	331.90 ± 11.31	417.29 ± 21.75	85.39	0.0023	cg06407111	55.63 ± 4.76	47.67 ± 6.53	-7.95	1.8 x 10-6	0.008	17	71384245	TRIM47	Body	N_Shore	Negative
WDR72	7988990	93.75 ± 10.01	140.73 ± 30.54	46.98	0.027	cg24866923	78.24 ± 5.16	67.36 ± 8.13	-10.87	1.8 x 10-5	0.016	15	51838531	WDR72	5'UTR	N_Shore	Negative
C8orf86	8150352	31.26 ± 0.71	28.49 ± 0.71	-2.77	0.012	cg23843812	27.19 ± 4.25	19.56 ± 4.32	-7.63	6.5 x 10-6	0.011	8	38505134	C8orf86	1stExon		Postive
CLEC3A	7997346	31.60 ± 0.74	27.69 ± 1.11	-3.91	0.015	cg21048669	45.10 ± 4.81	40.06 ± 3.36	-5.04	1.9 x 10-5	0.016	16	76613880	CLEC3A	TSS200		Postive
EFHA2	8144742	169.59 ± 7.22	135.58 ± 7.64	-34.01	0.049	cg07421329	36.75 ± 6.41	30.97 ± 3.85	-5.78	2.1 x 10-4	0.042	8	16953276	EFHA2	Body		Postive
GIT1	8013923	544.37 ± 18.99	447.17 ± 14.49	-97.2	0.0093	cg08217285	53.37 ± 5.03	45.82 ± 5.50	-7.55	5.9 x 10-6	0.011	17	24942005	GIT1;GIT1	TSS1500;TSS1500	N_Shore	Postive
GLP1R	8119338	644.61 ± 34.90	428.37 ± 55.32	-216.24	0.0012	cg19772011	40.00 ± 3.75	34.67 ± 3.58	-5.34	2.7 x 10-4	0.046	6	39123317	GLP1R	TSS1500	N_Shore	Postive
GNG7	8032509	384.45 ± 13.99	303.14 ± 17.09	-81.31	0.043	cg07843390	66.77 ± 5.95	60.52 ± 7.00	-6.24	2.5 x 10-4	0.045	19	2492015	GNG7	5'UTR	Island	Postive
GPR158	7926715	183.59 ± 10.99	142.13 ± 14.24	-41.46	0.015	cg15926910	72.78 ± 6.18	66.18 ± 7.66	-6.61	3.1 x 10-4	0.049	10	25508905	GPR158	Body	S_Shelf	Postive
INS-IGF2	7945688	526.50 ± 25.71	415.64 ± 22.15	-110.86	0.020	cg11005826	40.17 ± 8.11	31.39 ± 4.82	-8.77	1.7 x 10-4	0.038	11	2122537	IGF2AS;INS-IGF2;IGF2;IGF2AS	Body;Body;5'UTR;Body	S_Shore	Postive
INS-IGF2	7945688	526.50 ± 25.71	415.64 ± 22.15	-110.86	0.020	cg04112019	34.41 ± 8.76	24.25 ± 5.46	-10.16	1.5 x 10-4	0.036	11	2121712	IGF2AS;INS-IGF2;IGF2;IGF2AS	Body;Body;5'UTR;Body	Island	Postive
ITGB4	8009951	211.21 ± 9.36	282.55 ± 21.57	71.34	0.0088	cg16916914	24.96 ± 6.45	30.29 ± 8.02	5.33	2.6 x 10-4	0.046	17	71261289	ITGB4;ITGB4;ITGB4	Body;Body;Body	Island	Postive
KIRREL3	7952577	244.07 ± 11.31	188.54 ± 8.30	-55.53	0.0027	cg09913813	65.22 ± 5.13	59.22 ± 6.50	-6	2.0 x 10-4	0.041	11	126078995	KIRREL3;KIRREL3	Body;Body		Postive
KIRREL3	7952577	244.07 ± 11.31	188.54 ± 8.30	-55.53	0.0027	cg24057710	28.29 ± 4.93	21.55 ± 3.36	-6.75	7.6 x 10-5	0.028	11	125816305	KIRREL3;KIRREL3	Body;Body		Postive
MAN1C1	7899029	411.07 ± 17.85	345.33 ± 29.42	-65.74	0.045	cg10485752	71.71 ± 6.60	66.38 ± 5.52	-5.33	3.1 x 10-5	0.020	1	25894242	MAN1C1	Body		Postive
MAN1C1	7899029	411.07 ± 17.85	345.33 ± 29.42	-65.74	0.045	cg23675930	63.00 ± 6.93	55.34 ± 6.15	-7.66	1.7 x 10-5	0.016	1	25927287	MAN1C1	Body		Postive
MCF2L2	8092358	205.84 ± 11.51	149.94 ± 15.53	-55.9	0.0088	cg21857959	24.28 ± 5.58	17.71 ± 3.68	-6.57	2.7 x 10-4	0.047	3	184379689	MCF2L2	3'UTR	Island	Postive
NAT8	8053025	33.03 ± 0.77	29.18 ± 0.88	-3.85	0.0019	cg21376120	56.09 ± 3.92	50.81 ± 4.25	-5.28	8.6 x 10-7	0.006	2	73723024	NAT8;NAT8	5'UTR;1stExon		Postive
NAT8	8053025	33.03 ± 0.77	29.18 ± 0.88	-3.85	0.0019	cg08116137	64.48 ± 5.10	58.60 ± 5.74	-5.88	3.4 x 10-5	0.020	2	73724161	NAT8;ALMS1P	TSS1500;TSS1500		Postive
NCKAP5	8055323	65.25 ± 3.09	55.11 ± 2.72	-10.14	0.0043	cg17081914	44.95 ± 4.41	39.79 ± 4.82	-5.16	2.9 x 10-4	0.048	2	134042836	NCKAP5;NCKAP5	TSS1500;TSS1500		Postive
PRKCH	7974835	515.24 ± 24.50	427.26 ± 16.97	-87.98	0.037	cg01577114	48.38 ± 2.51	43.25 ± 4.19	-5.13	1.4 x 10-4	0.035	14	60976036	PRKCH	Body		Postive
PRKCH	7974835	515.24 ± 24.50	427.26 ± 16.97	-87.98	0.037	cg19859698	66.74 ± 6.68	59.69 ± 6.93	-7.05	1.1 x 10-4	0.032	14	60892360	PRKCH	Body		Postive
RPH3A	7958860	75.30 ± 3.02	63.82 ± 5.62	-11.48	0.047	cg17280408	65.92 ± 6.64	60.30 ± 6.61	-5.63	4.5 x 10-5	0.023	12	111759353	RPH3A;RPH3A	Body;Body		Postive
SDCBP2	8064418	488.14 ± 17.99	637.24 ± 44.84	149.1	0.0064	cg04428163	22.08 ± 5.99	30.34 ± 7.65	8.26	1.2 x 10-5	0.014	20	1242021	SDCBP2;SDCBP2	1stExon;Body	Island	Postive
SGK3	8146717	447.41 ± 16.21	365.61 ± 22.36	-81.8	0.0082	cg00345314	41.50 ± 7.04	32.72 ± 6.87	-8.78	2.0 x 10-4	0.041	8	67786948	SGK3	TSS1500	N_Shore	Postive
SIX2	8051949	658.58 ± 18.40	583.96 ± 37.58	-74.62	0.039	cg02893453	55.71 ± 4.83	50.68 ± 3.34	-5.03	5.8 x 10-6	0.011	2	45086392	SIX2	3'UTR	S_Shore	Postive
SIX2	8051949	658.58 ± 18.40	583.96 ± 37.58	-74.62	0.039	cg20318845	53.37 ± 4.74	48.27 ± 3.26	-5.1	2.3 x 10-4	0.044	2	45091285	SIX2	TSS1500	Island	Postive
SIX2	8051949	658.58 ± 18.40	583.96 ± 37.58	-74.62	0.039	cg17272224	45.54 ± 4.35	39.83 ± 2.33	-5.71	1.2 x 10-5	0.014	2	45091389	SIX2	TSS1500	S_Shore	Postive
SIX2	8051949	658.58 ± 18.40	583.96 ± 37.58	-74.62	0.039	cg24887265	57.84 ± 4.94	50.70 ± 6.40	-7.14	2.5 x 10-4	0.045	2	45087032	SIX2	Body	N_Shore	Postive
SIX2	8051949	658.58 ± 18.40	583.96 ± 37.58	-74.62	0.039	cg00366850	62.30 ± 5.03	54.83 ± 5.98	-7.47	1.8 x 10-5	0.016	2	45085921	SIX2	3'UTR	Island	Postive
SIX2	8051949	658.58 ± 18.40	583.96 ± 37.58	-74.62	0.039	cg02711647	25.71 ± 6.30	17.96 ± 4.68	-7.74	1.1 x 10-4	0.032	2	45091193	SIX2	TSS1500	Island	Postive
SLC17A6	7938975	404.27 ± 32.15	280.08 ± 36.87	-124.19	0.014	cg20809470	24.60 ± 5.46	18.82 ± 3.51	-5.79	3.1 x 10-4	0.049	11	22321413	SLC17A6	Body	S_Shore	Postive
SLC2A13	7962327	752.65 ± 38.37	606.03 ± 42.74	-146.62	0.0070	cg14678680	75.52 ± 5.34	68.72 ± 5.42	-6.79	2.3 x 10-5	0.018	12	38555057	SLC2A13	Body		Postive
SLC44A4	8125149	1117.52 ± 66.88	1353.14 ± 92.06	235.62	0.0051	cg27084746	11.65 ± 4.98	16.70 ± 6.93	5.05	1.2 x 10-4	0.034	6	31939511	NEU1;SLC44A4	TSS1500;Body	S_Shore	Postive
SPATA18	8095021	195.81 ± 7.28	207.12 ± 11.39	11.31	0.016	cg24395452	31.54 ± 5.50	38.61 ± 5.14	7.06	1.8 x 10-4	0.039	4	52637954	SPATA18	Body	Island	Postive
TGFBR3	7917649	1413.41 ± 82.68	1031.89 ± 90.65	-381.52	0.0008	cg23721586	54.62 ± 8.66	43.84 ± 10.81	-10.78	6.9 x 10-5	0.027	1	91970119	TGFBR3	Body		Postive
TMEM229B	7979721	69.97 ± 3.45	49.70 ± 3.53	-20.27	0.0051	cg09380594	69.11 ± 5.09	64.10 ± 5.95	-5.01	1.8 x 10-4	0.039	14	67050175	TMEM229B	5'UTR	N_Shore	Postive
TRIM15	8117849	145.98 ± 4.15	168.02 ± 7.48	22.04	0.012	cg21643178	21.87 ± 4.30	27.08 ± 5.02	5.21	1.3 x 10-4	0.035	6	30247552	TRIM15	Body	N_Shore	Postive
TRIM15	8117849	145.98 ± 4.15	168.02 ± 7.48	22.04	0.012	cg13567542	11.47 ± 4.31	17.55 ± 5.75	6.08	1.2 x 10-5	0.014	6	30247997	TRIM15	Body	Island	Postive
TRIM15	8117849	145.98 ± 4.15	168.02 ± 7.48	22.04	0.012	cg08858649	16.40 ± 7.71	26.11 ± 8.51	9.71	1.8 x 10-5	0.016	6	30247882	TRIM15	Body	Island	Postive
Probes shown in bold are CpG sites with opposite differences in DNA methylation and gene expression in T2D versus non-diabetic human islets. q-values are based on a FDR analysis.
